# Supplementary material for: Transcriptomic and phenotypic analysis of paralogous spx gene function in Bacillus anthracis Sterne
Source: PubMed Central journal article supplement (PMC3831629; doi:10.1002/mbo3.109), 2013-07-22
Supplement: mbo30002-0695-SD5.pdf [file mbo30002-0695-SD5.pdf]

**Table S3: SpxA1DD-activated genes. 15 min after induction.  $\geq 3$ -fold increase**SpxA1 15 min  $\geq 3$ -fold upregulated genes: Cell Surface and Virulence

| Locus  | GeneN                                                     | GeneS  | 15 min | Fold-change |
|--------|-----------------------------------------------------------|--------|--------|-------------|
| BA4325 | membrane protein, putative                                | NA     | 1.62   | 3.08        |
| BA0381 | ABC transporter, permease protein, putative               | NA     | 1.69   | 3.23        |
| BA3526 | arsenical pump family protein                             | NA     | 1.74   | 3.33        |
| BA1302 | transporter, putative                                     | NA     | 1.74   | 3.35        |
| BA4216 | drug resistance transporter, EmrB/QacA family             | NA     | 1.81   | 3.51        |
| BA5411 | ABC transporter, ATP-binding/permease protein             | NA     | 1.84   | 3.57        |
| BA3740 | ABC transporter, ATP-binding/permease protein             | NA     | 2.02   | 4.05        |
| BA0411 | transporter, EamA family                                  | NA     | 2.02   | 4.05        |
| BA4961 | drug resistance transporter, EmrB/QacA family             | NA     | 2.03   | 4.08        |
| BA2896 | transporter, putative                                     | NA     | 2.18   | 4.54        |
| BA3741 | ABC transporter, ATP-binding/permease protein             | NA     | 2.37   | 5.16        |
| BA0528 | ABC transporter, ATP-binding/permease protein             | NA     | 2.38   | 5.21        |
| BA5650 | ABC transporter, ATP-binding protein                      | NA     | 2.39   | 5.24        |
| BA0885 | S-layer protein Sap                                       | sap    | 2.41   | 5.31        |
| BA1196 | MATE efflux family protein                                | NA     | 2.45   | 5.47        |
| BA0382 | ABC transporter, substrate-binding protein, putative      | NA     | 2.72   | 6.57        |
| BA4498 | membrane protein, putative                                | NA     | 2.90   | 7.47        |
| BA3416 | membrane protein, putative                                | NA     | 2.90   | 7.48        |
| BA3607 | sodium/pantothenate symporter, putative                   | NA     | 2.97   | 7.82        |
| BA0535 | potassium channel protein, putative                       | NA     | 3.13   | 8.73        |
| BA4737 | membrane protein, putative                                | NA     | 3.13   | 8.75        |
| BA0532 | ABC transporter, ATP-binding protein                      | NA     | 3.21   | 9.28        |
| BA0533 | ABC transporter, permease protein, putative               | NA     | 3.27   | 9.62        |
| BA2279 | glycine betaine/L-proline ABC transporter, ATP-binding pr | proV-1 | 3.34   | 10.16       |
| BA3873 | membrane protein, putative                                | NA     | 3.37   | 10.35       |
| BA0534 | ABC transporter, permease protein, putative               | NA     | 4.20   | 18.33       |
| BA0521 | yfhP protein                                              | NA     | 1.61   | 3.04        |
| BA1830 | fosmidomycin resistance protein                           | fsR    | 1.86   | 3.63        |
| BA5649 | ABC transporter, permease protein                         | NA     | 1.89   | 3.70        |
| BA3179 | TspO/MBR family protein                                   | NA     | 1.93   | 3.81        |
| BA5645 | xanthine/uracil permease family protein                   | NA     | 1.93   | 3.81        |
| BA0415 | dedA family protein                                       | NA     | 1.93   | 3.82        |
| BA4577 | hydrolase, alpha/beta fold family                         | NA     | 2.09   | 4.24        |
| BA1825 | multidrug resistance protein, putative, authentic framesh | NA     | 2.09   | 4.26        |
| BA0674 | multidrug resistance protein, putative                    | NA     | 2.16   | 4.48        |
| BA0244 | major facilitator family transporter                      | NA     | 2.17   | 4.49        |
| BA0251 | lipoprotein, putative                                     | NA     | 2.18   | 4.55        |
| BA2933 | lipoprotein, putative                                     | NA     | 1.63   | 3.11        |
| BA0837 | lipoprotein, putative                                     | NA     | 3.65   | 12.58       |
| BA1038 | drug resistance transporter, EmrB/QacA family             | NA     | 2.28   | 4.85        |
| BA3429 | gluconate permease                                        | gntP-2 | 2.43   | 5.39        |
| BA2280 | glycine betaine/L-proline ABC transporter, permease prot  | NA     | 2.46   | 5.49        |
| BA1037 | major facilitator family transporter                      | NA     | 2.77   | 6.83        |
| BA1960 | aminoglycoside 6-adenylyltransferase, putative            | NA     | 2.86   | 7.26        |
| BA1881 | rhodanese-like domain protein                             | NA     | 1.85   | 3.60        |
| BA0554 | glycine betaine transporter                               | opuD-1 | 2.98   | 7.88        |
| BA0787 | major facilitator family transporter                      | NA     | 3.17   | 9.01        |
| BA1858 | major facilitator family transporter                      | NA     | 3.32   | 10.00       |
| BA1880 | transport protein, NRAMP family                           | NA     | 3.41   | 10.60       |
| BA3020 | major facilitator family transporter                      | NA     | 4.36   | 20.47       |
| BA4725 | xanthine/uracil permease family protein                   | NA     | 3.54   | 11.61       |
| BA3614 | rarD protein                                              | NA     | 3.59   | 12.03       |
| BA5048 | conserved hypothetical protein TIGR00278                  | NA     | 1.71   | 3.27        |
| BA2357 | hypothetical protein                                      | NA     | 2.69   | 6.47        |

SpxA1 15 min  $\geq 3$ -fold upregulated genes: Unknown

| Locus  | GeneN                                          | GeneS | 15 min | Fold-change |
|--------|------------------------------------------------|-------|--------|-------------|
| BA4936 | hypothetical protein                           | NA    | 1.59   | 3.01        |
| BA4867 | conserved domain protein                       | NA    | 1.67   | 3.19        |
| BA1036 | conserved hypothetical protein                 | NA    | 1.72   | 3.30        |
| BA5255 | conserved hypothetical protein TIGR00106       | NA    | 1.74   | 3.35        |
| BA0848 | conserved hypothetical protein                 | NA    | 1.75   | 3.36        |
| BA3069 | conserved hypothetical protein                 | NA    | 1.82   | 3.53        |
| BA0380 | conserved hypothetical protein                 | NA    | 1.85   | 3.60        |
| BA1962 | hypothetical protein                           | NA    | 1.89   | 3.70        |
| BA1959 | hypothetical protein                           | NA    | 1.92   | 3.79        |
| BA1785 | conserved hypothetical protein                 | NA    | 1.92   | 3.79        |
| BA3694 | conserved hypothetical protein                 | NA    | 1.97   | 3.91        |
| BA2011 | hypothetical protein                           | NA    | 2.01   | 4.03        |
| BA5488 | conserved domain protein                       | NA    | 2.03   | 4.10        |
| BA3874 | hypothetical protein                           | NA    | 2.04   | 4.10        |
| BA5491 | conserved hypothetical protein, authentic frar | NA    | 2.06   | 4.16        |
| BA2867 | hypothetical protein                           | NA    | 2.41   | 5.32        |
| BA1775 | hypothetical protein                           | NA    | 2.50   | 5.64        |
| BA2546 | conserved hypothetical protein                 | NA    | 2.70   | 6.52        |
| BA3798 | hypothetical protein                           | NA    | 2.76   | 6.79        |
| BA1262 | hypothetical protein                           | NA    | 2.98   | 7.89        |
| BA3618 | hypothetical protein                           | NA    | 3.07   | 8.41        |
| BA0862 | conserved hypothetical protein                 | NA    | 1.64   | 3.12        |
| BA4935 | hypothetical protein                           | NA    | 1.64   | 3.12        |

SpxA1 15 min  $\geq 3$ -fold upregulated genes: Protein synthesis & degradation

| Locus  | GeneN                                                              | GeneS  | 15 min | Fold-change |
|--------|--------------------------------------------------------------------|--------|--------|-------------|
| BA3947 | tRNA pseudouridine synthase B                                      | truB   | 1.64   | 3.13        |
| BA4861 | proline dipeptidase                                                | pepQ-2 | 1.72   | 3.30        |
| BA4324 | hydrolase, alpha/beta fold family, putative                        | NA     | 1.84   | 3.59        |
| BA1558 | glycosyl transferase, group 1 family protein                       | NA     | 2.09   | 4.26        |
| BA3684 | alanyl-tRNA synthetase family protein                              | NA     | 2.17   | 4.50        |
| BA1110 | Ser/Thr protein phosphatase family protein, authentic point mutati | NA     | 2.56   | 5.88        |
| BA4431 | lipoate-protein ligase A, putative                                 | NA     | 1.82   | 3.54        |
| BA0493 | acetylnitine deacetylase, putative                                 | NA     | 2.06   | 4.17        |
| BA3877 | hydrolase, alpha/beta fold family                                  | NA     | 3.87   | 14.57       |
| BA3923 | conserved hypothetical protein                                     | NA     | 2.23   | 4.68        |

SpxA1 15 min  $\geq 3$ -fold upregulated genes: Oxidative Stress

| Locus  | GeneN                                                 | GeneS  | 15 min | Fold-change |
|--------|-------------------------------------------------------|--------|--------|-------------|
| BA5387 | thioredoxin reductase                                 | trxB   | 1.63   | 3.09        |
| BA1515 | pyridine nucleotide-disulfide oxidoreductase family   | NA     | 1.64   | 3.11        |
| BA4923 | oxidoreductase, Gfo/Idh/MocA family                   | NA     | 1.71   | 3.27        |
| BA2288 | CBS domain protein                                    | NA     | 1.91   | 3.76        |
| BA3655 | oxidoreductase, Gfo/Idh/MocA family                   | NA     | 2.02   | 4.07        |
| BA0196 | oxidoreductase, aldo/keto reductase family            | NA     | 2.05   | 4.13        |
| BA4945 | thioredoxin family protein                            | NA     | 2.06   | 4.18        |
| BA2119 | glutathione peroxidase                                | bsaA   | 2.17   | 4.49        |
| BA3602 | oxidoreductase, short-chain dehydrogenase/reduct:     | NA     | 2.21   | 4.63        |
| BA0197 | pyrroline-5-carboxylate reductase, putative           | NA     | 2.28   | 4.86        |
| BA2059 | CBS domain protein                                    | NA     | 2.51   | 5.69        |
| BA4319 | oxidoreductase, aldo/keto reductase family            | NA     | 2.56   | 5.90        |
| BA1263 | pyridine nucleotide-disulfide oxidoreductase, class I | NA     | 3.70   | 12.98       |
| BA1209 | protozoan/cyanobacterial globin family protein        | NA     | 3.43   | 10.79       |
| BA1200 | conserved hypothetical protein                        | NA     | 1.93   | 3.81        |
| BA1208 | conserved hypothetical protein                        | NA     | 3.03   | 8.14        |
| BA1951 | conserved hypothetical protein                        | NA     | 5.03   | 32.58       |
| BA4058 | conserved hypothetical protein                        | NA     | 1.74   | 3.35        |
| BA4059 | 2-dehydropantoate 2-reductase                         | panE   | 1.63   | 3.09        |
| BA1555 | dihydrodipicolinate reductase                         | dapB   | 1.67   | 3.19        |
| BA4318 | lolS protein                                          | lolS   | 1.69   | 3.22        |
| BA2016 | bacterial luciferase family protein                   | NA     | 2.00   | 4.00        |
| BA1884 | 2-dehydropantoate 2-reductase                         | panE   | 2.16   | 4.46        |
| BA5687 | peptide methionine sulfoxide reductase                | msrA-2 | 2.82   | 7.05        |
| BA4874 | 3-oxoacyl-(acyl-carrier-protein) reductase, putative  | NA     | 2.82   | 7.08        |
| BA2172 | hypothetical protein                                  | NA     | 1.68   | 3.21        |
| BA4160 | conserved hypothetical protein                        | NA     | 2.50   | 5.67        |

SpxA1 15 min  $\geq 3$ -fold upregulated genes: Metabolism

| Locus  | GeneN                                                 | GeneS  | 15 min | Fold-change |
|--------|-------------------------------------------------------|--------|--------|-------------|
| BA0499 | glutaminase A                                         | glsA-1 | 1.59   | 3.01        |
| BA1296 | aldehyde dehydrogenase                                | ywdH   | 1.99   | 3.98        |
| BA3428 | gluconate kinase                                      | gntK   | 2.08   | 4.23        |
| BA2289 | aldehyde dehydrogenase family protein                 | NA     | 2.13   | 4.36        |
| BA3849 | alcohol dehydrogenase, iron-containing, authentic fr  | NA     | 2.14   | 4.42        |
| BA0675 | alcohol dehydrogenase, zinc-containing                | NA     | 2.15   | 4.45        |
| BA2038 | NADH:flavin oxidoreductase / NADH oxidase family p    | NA     | 2.16   | 4.46        |
| BA1556 | methylglyoxal synthase                                | mgsA   | 2.23   | 4.71        |
| BA3430 | transaldolase, putative                               | NA     | 2.29   | 4.88        |
| BA3438 | alcohol dehydrogenase, zinc-containing                | NA     | 2.43   | 5.39        |
| BA0838 | NAD(P)H dehydrogenase, quinone family                 | NA     | 2.66   | 6.32        |
| BA3433 | glucose-6-phosphate 1-dehydrogenase                   | zwf    | 2.72   | 6.60        |
| BA3432 | transketolase                                         | tkt-1  | 3.03   | 8.19        |
| BA3704 | glyoxylase family protein                             | NA     | 2.36   | 5.14        |
| BA1520 | isopentenyl-diphosphate delta-isomerase               | NA     | 1.59   | 3.02        |
| BA3876 | phosphoglycerate mutase family protein, putative      | NA     | 1.62   | 3.07        |
| BA0624 | norQ protein, putative                                | NA     | 1.65   | 3.14        |
| BA5335 | carboxylesterase                                      | estA   | 1.75   | 3.37        |
| BA1496 | resC protein                                          | resC   | 1.76   | 3.40        |
| BA0596 | nicotinate phosphoribosyltransferase, putative        | NA     | 1.81   | 3.51        |
| BA2647 | alcohol dehydrogenase, zinc-containing                | NA     | 1.82   | 3.54        |
| BA4588 | glyoxalase family protein, authentic frameshift       | NA     | 1.84   | 3.57        |
| BA5043 | mutT/nudix family protein                             | NA     | 1.85   | 3.61        |
| BA2418 | protoporphyrinogen oxidase                            | hemY-2 | 1.88   | 3.68        |
| BA5648 | uracil-DNA glycosylase                                | ung    | 1.94   | 3.83        |
| BA0250 | holo-(acyl-carrier-protein) synthase                  | acpS   | 1.95   | 3.86        |
| BA5209 | 5-nucleotidase family protein, truncation             | NA     | 1.98   | 3.94        |
| BA2947 | sulfatase                                             | NA     | 2.13   | 4.39        |
| BA3703 | phospholipase/carboxylesterase family protein         | NA     | 2.25   | 4.76        |
| BA1767 | fumarate hydratase, class II                          | fumC   | 2.30   | 4.91        |
| BA5135 | D-isomer specific 2-hydroxyacid dehydrogenase famil   | NA     | 2.27   | 4.81        |
| BA2117 | metallo-beta-lactamase family protein                 | NA     | 2.30   | 4.92        |
| BA4359 | pyrroline-5-carboxylate reductase                     | proC-3 | 2.32   | 5.00        |
| BA2053 | cytosolic long-chain acyl-CoA thioester hydrolase fam | NA     | 2.35   | 5.11        |
| BA3431 | 6-phosphogluconate dehydrogenase family protein       | NA     | 2.36   | 5.13        |
| BA1831 | cysteine synthase A                                   | cysK-2 | 2.42   | 5.36        |
| BA1434 | D-isomer specific 2-hydroxyacid dehydrogenase famil   | NA     | 2.50   | 5.65        |
| BA5651 | lipase/acylhydrolase, putative                        | NA     | 2.56   | 5.90        |
| BA3545 | phosphoglycerate mutase, putative                     | NA     | 2.90   | 7.49        |
| BA3392 | hydrolase, haloacid dehalogenase-like family          | NA     | 2.99   | 7.96        |
| BA3620 | mrp protein                                           | NA     | 3.85   | 14.46       |
| BA1242 | conserved hypothetical protein                        | NA     | 1.63   | 3.10        |
| BA4988 | conserved hypothetical protein                        | NA     | 1.74   | 3.35        |
| BA5281 | conserved hypothetical protein                        | NA     | 1.89   | 3.71        |
| BA5031 | conserved hypothetical protein                        | NA     | 1.90   | 3.74        |
| BA1210 | conserved hypothetical protein                        | NA     | 1.95   | 3.87        |
| BA4946 | conserved hypothetical protein                        | NA     | 2.29   | 4.90        |

|        |                                          |    |      |       |
|--------|------------------------------------------|----|------|-------|
| BA5032 | hypothetical protein                     | NA | 2.57 | 5.95  |
| BA5482 | hypothetical protein                     | NA | 3.36 | 10.25 |
| BA5708 | conserved hypothetical protein TIGR00246 | NA | 2.32 | 4.99  |

SpxA1 15 min  $\geq 3$ -fold upregulated genes: Gene Regulation

| Locus  | GeneN                                         | GeneS | 15 min | Fold-change |
|--------|-----------------------------------------------|-------|--------|-------------|
| BA1111 | HD domain protein                             | NA    | 1.61   | 3.06        |
| BA1510 | negative regulator of competence MecA, puta   | NA    | 1.66   | 3.17        |
| BA5105 | sensor histidine kinase                       | NA    | 1.66   | 3.17        |
| BA0079 | phosphotransferase domain protein             | NA    | 1.69   | 3.23        |
| BA5713 | YycH protein                                  | NA    | 1.74   | 3.34        |
| BA0585 | DNA-binding response regulator                | NA    | 1.79   | 3.46        |
| BA5714 | sensory box histidine kinase YycG             | yycG  | 1.81   | 3.51        |
| BA5148 | comA operon protein, putative                 | NA    | 1.88   | 3.68        |
| BA0080 | negative regulator of genetic competence ClpI | NA    | 1.95   | 3.86        |
| BA0975 | HD domain protein                             | NA    | 2.02   | 4.07        |
| BA3708 | transcriptional regulator, CarD family        | NA    | 2.05   | 4.13        |
| BA0077 | transcriptional regulator CtsR                | ctsR  | 2.07   | 4.20        |
| BA4541 | heat-inducible transcription repressor HrcA   | hrcA  | 2.10   | 4.28        |
| BA4736 | DNA-binding response regulator                | NA    | 2.87   | 7.29        |
| BA3543 | transcriptional regulator, LysR family        | NA    | 3.37   | 10.31       |
| BA1119 | DNA-binding response regulator                | NA    | 3.70   | 12.97       |
| BA1118 | sensor histidine kinase                       | NA    | 4.17   | 17.99       |
| BA3907 | conserved hypothetical protein                | NA    | 1.73   | 3.33        |
| BA4543 | conserved hypothetical protein                | NA    | 1.72   | 3.30        |
| BA1560 | birA bifunctional protein                     | birA  | 2.31   | 4.95        |
| BA5424 | cold shock protein CspC                       | cspC  | 2.36   | 5.12        |
| BA0938 | conserved hypothetical protein                | NA    | 1.65   | 3.13        |
| BA4739 | conserved hypothetical protein                | NA    | 2.38   | 5.22        |

SpxA1 15 min  $\geq 3$ -fold upregulated genes: DNA Replication and Repair

| Locus  | GeneN                             | GeneS  | 15 min | Fold-change |
|--------|-----------------------------------|--------|--------|-------------|
| BA4628 | ATPase, AAA family                | NA     | 1.85   | 3.62        |
| BA5487 | helicase, putative                | NA     | 1.86   | 3.63        |
| BA0081 | DNA repair protein RadA           | radA   | 2.05   | 4.15        |
| BA1505 | ATP-dependent DNA helicase RecQ   | recQ-1 | 2.11   | 4.31        |
| BA0037 | deoxyribonuclease, TatD family    | NA     | 2.12   | 4.34        |
| BA4757 | excinuclease ABC, C subunit       | uvrC   | 2.29   | 4.91        |
| BA3335 | conserved hypothetical protein    | NA     | 2.00   | 3.99        |
| BA4868 | acetyltransferase, GNAT family    | NA     | 2.22   | 4.67        |
| BA1832 | acetyltransferase, GNAT family    | NA     | 2.46   | 5.52        |
| BA1141 | ATP-dependent nuclease, subunit B | addB   | 1.61   | 3.05        |
| BA0078 | conserved hypothetical protein    | NA     | 1.82   | 3.52        |
| BA2174 | conserved hypothetical protein    | NA     | 1.61   | 3.05        |
| BA1833 | conserved domain protein          | NA     | 2.36   | 5.12        |



SpxA1 15 min  $\geq 3$ -fold upregulated genes: Division and Sporulation

| Locus  | GeneN                    | GeneS | 15 min | Fold-change |
|--------|--------------------------|-------|--------|-------------|
| BA4724 | germination protein GerE | gerE  | 2.09   | 4.26        |

SpxA1 15 min  $\geq 3$ -fold upregulated genes: Unknown

| Locus  | GeneN                                          | GeneS | 15 min | Fold-change |
|--------|------------------------------------------------|-------|--------|-------------|
| BA4936 | hypothetical protein                           | NA    | 1.59   | 3.01        |
| BA4867 | conserved domain protein                       | NA    | 1.67   | 3.19        |
| BA1036 | conserved hypothetical protein                 | NA    | 1.72   | 3.30        |
| BA5255 | conserved hypothetical protein TIGR00106       | NA    | 1.74   | 3.35        |
| BA0848 | conserved hypothetical protein                 | NA    | 1.75   | 3.36        |
| BA3069 | conserved hypothetical protein                 | NA    | 1.82   | 3.53        |
| BA0380 | conserved hypothetical protein                 | NA    | 1.85   | 3.60        |
| BA1962 | hypothetical protein                           | NA    | 1.89   | 3.70        |
| BA1959 | hypothetical protein                           | NA    | 1.92   | 3.79        |
| BA1785 | conserved hypothetical protein                 | NA    | 1.92   | 3.79        |
| BA3694 | conserved hypothetical protein                 | NA    | 1.97   | 3.91        |
| BA2011 | hypothetical protein                           | NA    | 2.01   | 4.03        |
| BA5488 | conserved domain protein                       | NA    | 2.03   | 4.10        |
| BA3874 | hypothetical protein                           | NA    | 2.04   | 4.10        |
| BA5491 | conserved hypothetical protein, authentic frar | NA    | 2.06   | 4.16        |
| BA2867 | hypothetical protein                           | NA    | 2.41   | 5.32        |
| BA1775 | hypothetical protein                           | NA    | 2.50   | 5.64        |
| BA2546 | conserved hypothetical protein                 | NA    | 2.70   | 6.52        |
| BA3798 | hypothetical protein                           | NA    | 2.76   | 6.79        |
| BA1262 | hypothetical protein                           | NA    | 2.98   | 7.89        |
| BA3618 | hypothetical protein                           | NA    | 3.07   | 8.41        |
| BA0862 | conserved hypothetical protein                 | NA    | 1.64   | 3.12        |
| BA4935 | hypothetical protein                           | NA    | 1.64   | 3.12        |
